# Supplementary material for: β-Lapachone suppresses neuroinflammation by modulating the expression of cytokines and matrix metalloproteinases in activated microglia
Source: PubMed Central journal article supplement (PMC4502557; doi:10.1186/s12974-015-0355-z), 2015-07-16
Supplement: 12974_2015_355_MOESM1_ESM.pdf [file 12974_2015_355_MOESM1_ESM.pdf]

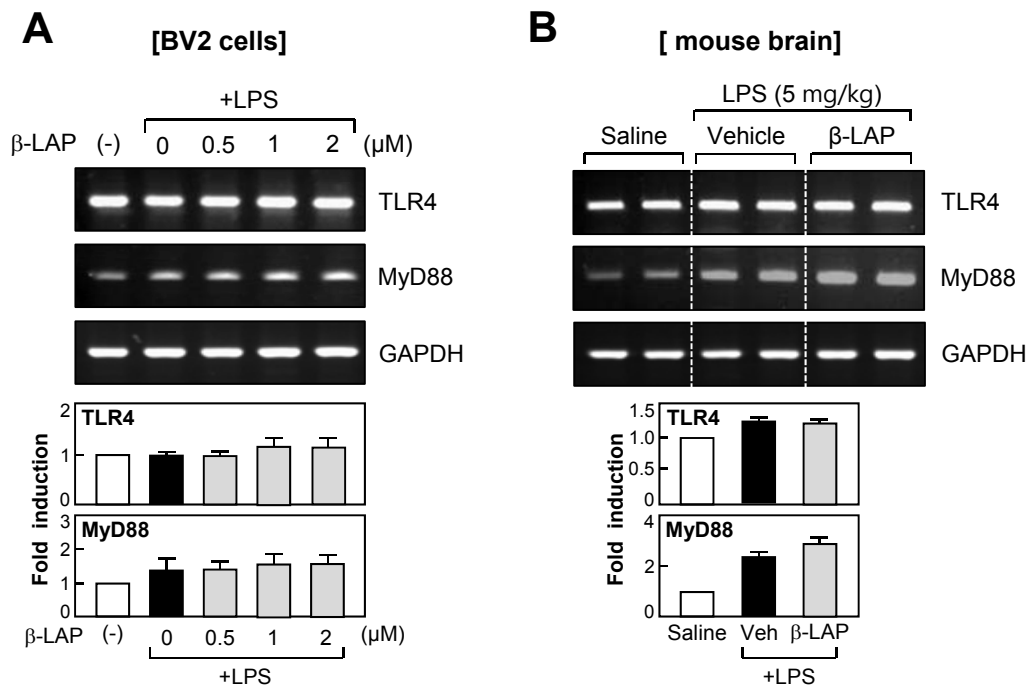

**Supplementary Figure 1. Effects of  $\beta$ -lapachone on TLR4 and MyD88 expression in LPS-stimulated BV2 cells and mouse brain. (A)** BV2 cells were pre-treated with  $\beta$ -LAP (0.5, 1, 2  $\mu$ M) for 1 h, followed by treatment with LPS (100 ng/ml) for 6 h. Subsequently, total RNA was isolated and RT-PCR analysis was performed. **(B)** mRNA expression levels in the mouse brain were measured by RT-PCR analysis after 3 h of LPS injection.  $\beta$ -LAP (10 mg/kg, i.p.) was given daily for 4 days before LPS treatment. Representative gels of RT-PCR analysis are shown on the top, and quantifications of three independent experiments are shown in the bottom panel. Values correspond to the mean  $\pm$  S.E.M. of three independent experiments.

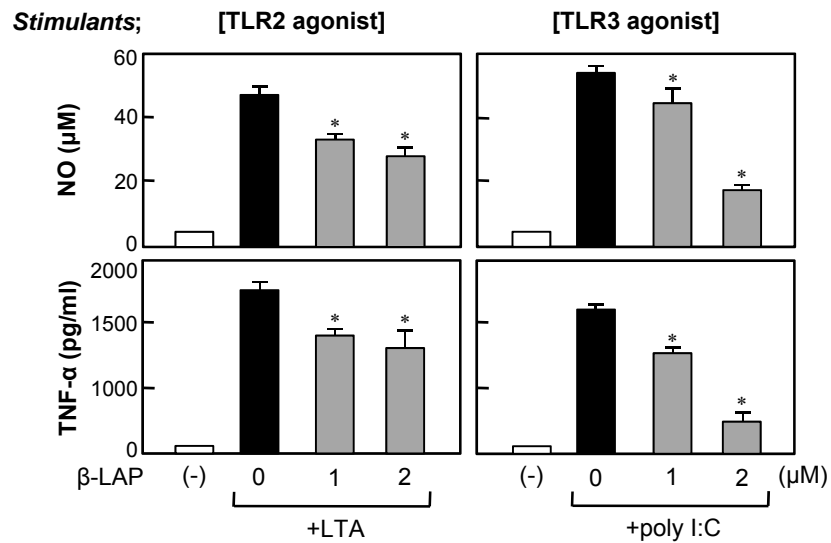

**Supplementary Figure 2: Effects of  $\beta$ -lapachone on NO and TNF- $\alpha$  production in LTA (TLR2 agonist) or Poly I:C (TLR3 agonist)-stimulated BV2 microglial cells.** Cells were incubated for 24 h with LTA (10  $\mu$ g/ml) or Poly I:C (25  $\mu$ g/ml) in the absence or presence of  $\beta$ -lapachone and the amounts of NO and TNF- $\alpha$  were measured in the supernatants. The bars indicate the mean  $\pm$  S.E.M. of three independent experiments. \* $P$ <0.05; significantly different from stimulant-treated cells.
